# Supplementary material
Source: publisher figshare collection journal article supplement (https://tandf.figshare.com/ndownloader/files/12936422)
Supplement: Supplementary file 1 [file 12936422]

**Electronic Supporting Information**

**Structures, stabilities and electronic properties of boron-doped silicon clusters B3Sin (n=1-17) and their anions**

Cheng-Gang Lia, b, Jin-Hai Gaoa, Jie Zhanga, Wan-Ting Songa, Shui-Qing Liua, Si-Zhuo Gaoa, Bao-Zeng Renb, Yan-Fei Huc d[[1]](#footnote-2)*

*a College of Physics and Electronic Engineering, Quantum Materials Research Center, Zhengzhou Normal University, Zhengzhou 450044, China*

*b School of Chemical Engineering and Energy, Zhengzhou University, Zhengzhou 450001, China*

*c School of Physics and Electronic Engineering, Sichuan University of Science ＆ Engineering,*

*Zigong 643000, China*

*d National Key Laboratory for Shock Wave and Detonation Physics Research, Institute of Fluid*

*Physics, China Academy of Engineering Physics, Mianyang 621999, China*

*Correspondence to: Yan-FeiHu, School of Physics and Electronic Engineering, Sichuan University of Science ＆ Engineering, Zigong 643000, China. E-mail address: [yanfei_­­hu1982@suse.edu.cn](mailto:huyanfei1982@126.com)

Cartesian cordialities for the lowest-energy structures and low-lying isomers are listed in the paper.

Neutral clusters

B3Si Cluster

B 0.00000000 0.00000000 -1.86665100

B 0.00000000 0.88471400 -0.61865000

B 0.00000000 -0.88471400 -0.61865000

Si 0.00000000 0.00000000 1.10855400

B3Si2 Cluster

B 0.00000000 0.00000000 0.38749300

B 0.00000000 0.78046500 -1.16084100

B 0.00000000 -0.78046500 -1.16084100

Si 0.00000000 -1.98713300 0.34539100

Si 0.00000000 1.98713300 0.34539100

B3Si3 Cluster

B 0.00000000 0.78374200 0.00000000

B 0.43737200 -0.83611400 0.00000000

B 1.55670100 0.38795900 0.00000000

Si 2.48310400 -1.26628000 0.00000000

Si -1.71208200 1.76432900 0.00000000

Si -1.48319100 -0.61790100 0.00000000

B3Si4 Cluster

B 0.40030000 -1.43473900 0.78867000

B 0.40030000 -1.43473900 -0.78867000

B 1.01780500 -0.08421400 0.00000000

Si -0.05846700 1.58709600 0.00000000

Si 0.40030000 0.00269800 2.06594500

Si -1.39156200 -0.53760300 0.00000000

Si 0.40030000 0.00269800 -2.06594500

B3Si5 Cluster

B 0.28285900 -0.01058300 0.82857300

B 0.08818400 1.42656900 0.00000000

B 0.28285900 -0.01058300 -0.82857300

Si -0.07921000 -0.86975400 2.50632700

Si -0.07921000 1.57235400 1.97789700

Si -0.07921000 -0.86975400 -2.50632700

Si 0.08330200 -1.90712900 0.00000000

Si -0.07921000 1.57235400 -1.97789700

B3Si6 Cluster

B 0.68863800 0.04294700 -0.84092600

B -0.88744500 0.17318400 -0.30655000

B -0.13448300 -1.32999600 -0.25509300

Si 2.45772800 0.75802000 -0.23968700

Si 0.13635500 1.94938000 -0.24861100

Si 0.62006300 -0.04070500 1.45922200

Si -2.12134100 -1.45936800 -0.11758500

Si 1.80969800 -1.62681000 -0.30802500

Si -2.78347000 0.81729200 -0.04439700

B3Si7 Cluster

B -0.67027700 0.20942100 -0.59479000

B -0.06610200 -1.33249700 -0.20309300

B 0.60034200 -0.01372000 0.72439700

Si 1.25983800 0.04499900 -1.56460900

Si -1.33724900 -0.22699100 1.60955600

Si -2.51240200 0.99111700 -0.28700500

Si -2.03635300 -1.40452200 -0.55065400

Si 1.86197000 -1.66152800 0.26146800

Si 2.49030500 0.70409300 0.60522000

Si 0.32247600 1.95883000 -0.04773200

B3Si8 Cluster

B -0.86066900 0.02991600 -0.85580100

B 0.40806300 0.81595400 0.07149700

B 0.28776600 -1.02852200 -0.05477500

Si 2.26887000 -1.33965700 -0.24757200

Si 2.34883400 1.34410500 -0.10837500

Si -2.85604800 0.11496500 -0.62660900

Si -1.20774800 -0.03744600 1.50088900

Si -1.57404100 -1.90362000 -0.12653300

Si -1.36988800 1.96996800 0.03300100

Si 1.06773900 0.06846300 -1.88361200

Si 1.38115300 -0.15154500 1.75848100

B3Si9 Cluster

B 0.00000000 1.04768300 0.29861000

B -0.90732000 -0.52384200 0.29861000

B 0.90732000 -0.52384200 0.29861000

Si 0.00000000 1.68049400 -1.70545500

Si -1.45535000 -0.84024700 -1.70545500

Si 1.45535000 -0.84024700 -1.70545500

Si 0.00000000 -1.53847400 1.97449100

Si 1.33235800 0.76923700 1.97449100

Si -1.33235800 0.76923700 1.97449100

Si 0.00000000 -2.35054600 -0.37568200

Si 2.03563300 1.17527300 -0.37568200

Si -2.03563300 1.17527300 -0.37568200

B3Si10 Cluster

B -0.11630800 0.82689200 0.52621800

B -0.43276400 -0.68171400 -0.36725200

B 1.48383300 1.37485500 0.33435800

Si -1.00447400 -0.60148600 1.76761800

Si -1.95977500 1.74017100 0.89396800

Si 0.12072300 2.82322500 -0.01424900

Si 3.24973500 0.51355100 0.22550900

Si 1.45794700 -0.64340600 1.33102500

Si -1.79513000 -2.19609100 -0.03267800

Si -2.43742400 -0.00282800 -1.01925500

Si -0.25333600 0.98813500 -1.71991400

Si 1.59531800 -0.63424100 -1.35277500

Si 0.69257300 -2.52989800 -0.25543700

B3Si11 Cluster

B -0.00177100 1.45115700 -0.13761100

B -1.33607400 0.32238900 -0.03357700

B 0.26709600 -0.30860300 0.03084500

Si 1.48981100 1.03541900 -1.45049600

Si -1.26467900 -1.56410900 -1.07171000

Si 0.99191700 -0.95250100 2.09820600

Si -3.04503100 0.28071400 1.22297000

Si 2.33273700 -1.21732000 0.11417100

Si 0.99551100 -1.32413500 -1.88533800

Si 1.48795500 1.28426400 1.23429600

Si -1.26906200 -1.33835400 1.33997000

Si -1.80850400 2.29974700 -0.20010000

Si -3.04309400 0.03805000 -1.26463600

Si 3.51484800 0.93503100 -0.08721100

B3Si12 Cluster

B -0.12662700 -0.37303700 0.87676400

B -0.12662700 -0.37303700 -0.87676400

B 0.01164400 1.11174200 0.00000000

Si -1.44777600 -1.18126800 -2.26847100

Si -1.11957200 1.24507900 -1.95212700

Si -1.09816000 2.85966400 0.00000000

Si -1.11957200 1.24507900 1.95212700

Si -1.44777600 -1.18126800 2.26847100

Si -1.17894700 -2.07275000 0.00000000

Si 1.14389100 -1.41503100 -2.15566200

Si 1.26114600 0.97558400 -1.90385300

Si 1.53995300 2.53453700 0.00000000

Si 1.26114600 0.97558400 1.90385300

Si 1.14389100 -1.41503100 2.15566200

Si 1.14806500 -2.70077300 0.00000000

B3Si13 Cluster

B -0.48984600 -0.77144400 -0.18030600

B -0.10682500 0.96411500 0.03603000

B 1.16775100 -0.20224600 -0.01765200

Si -1.40884400 -1.51783300 -2.02328500

Si -0.46846100 2.74517700 -1.11492200

Si 0.93888600 -1.89200000 -1.46551400

Si 1.72828600 1.84244400 -0.80348200

Si -1.00844800 -1.63723500 2.04225400

Si -0.96450400 2.23239400 1.39900000

Si 1.00844300 -2.21289600 0.93564200

Si 1.41680100 1.51279300 1.53511200

Si 2.86543400 -0.26636600 -1.27266600

Si 2.75827400 -0.58977800 1.27177700

Si -2.42336700 -1.68579900 0.24097100

Si -1.73757200 0.77207100 -1.38000900

Si -2.90888500 0.70045000 0.69295200

B3Si14 Cluster

B 0.26319600 -0.53458500 0.90888000

B -1.05140800 0.14628000 0.00000000

B 0.26319600 -0.53458500 -0.90888000

Si -3.07164700 -0.29602200 0.00000000

Si 1.69635300 2.84655700 0.00000000

Si 1.95461600 -0.92655600 -2.04197700

Si -1.51622200 -1.18058200 1.80781300

Si 0.35055400 -2.63677500 1.27368100

Si 0.35055400 -2.63677500 -1.27368100

Si -0.11407700 2.08155300 1.34764000

Si -2.04927100 2.04076900 0.00000000

Si 0.05737300 0.31523200 -2.93399900

Si 1.95461600 -0.92655600 2.04197700

Si -1.51622200 -1.18058200 -1.80781300

Si 2.14758300 0.43255800 0.00000000

Si 0.05737300 0.31523200 2.93399900

Si -0.11407700 2.08155300 -1.34764000

B3Si15 Cluster

B 0.80707900 1.00244300 -0.05723900

B -0.50198700 -0.05860900 0.23344700

B 1.15256000 -0.73125600 0.03723700

Si 1.56967500 2.70983800 0.87865500

Si -0.65575700 1.78925600 1.41567000

Si 2.80250300 0.57710900 0.82332500

Si -2.78754400 2.35693200 0.10029300

Si 2.34518200 0.35924600 -1.55236200

Si -2.72424600 -0.02055600 0.40752700

Si 2.05419500 -1.34668300 2.02115100

Si -1.28578400 -0.37074400 2.28665100

Si 1.07595300 2.42454600 -1.60010700

Si -1.14990400 1.38636600 -1.41848400

Si 1.24396400 -1.71179800 -1.94280900

Si -1.12318500 -0.94988900 -1.75278600

Si 1.57318400 -2.85158800 0.18887000

Si -0.65818400 -2.14794500 0.71685800

Si -2.80064300 -2.28001100 -0.64868300

B3Si16 Cluster

B 0.08243600 1.29861200 -0.24616500

B -0.16179600 0.02334700 0.96087600

B 0.15484600 -1.05353700 -0.33816200

Si -1.35593700 -0.29030700 -1.95548300

Si -1.74302600 -0.45761500 2.41904100

Si 2.35054500 1.55399300 0.19443200

Si -0.79253200 2.06595600 -2.04948200

Si 0.55424900 -0.06324700 3.00059500

Si -1.75627100 -1.83447200 0.48634300

Si 0.31938900 -2.01461400 -2.17087800

Si 1.48873200 -1.46738200 1.23366600

Si 2.08087500 -0.66443300 -1.46702000

Si -1.25438300 3.01536500 0.25309700

Si -2.37416000 0.91354200 0.61210400

Si -3.41009400 -0.72625900 -0.87897400

Si 0.10541400 -3.21885500 0.06154500

Si 3.60285900 -0.58331100 0.36107300

Si 1.52035200 1.59913300 -1.94608000

Si 0.63702900 2.07664100 1.71153900

B3Si17 Cluster

B 0.42599100 -0.91470100 -0.62293900

B 0.04909100 -0.22276100 0.99546000

B -1.23102800 -0.53638500 -0.14209800

Si 1.90615800 -1.34007700 0.88808000

Si 3.77988900 0.21259300 0.70119100

Si 2.46298200 0.61582700 -1.26290300

Si 1.28090200 -0.95191500 -2.56317400

Si 1.33677300 -2.83263100 -0.96144800

Si -0.91474100 0.01983700 -2.25089100

Si 1.47119600 2.70850800 -1.01652200

Si -1.44947500 -1.85262000 1.65887500

Si -2.75949400 -1.36808900 -1.57395800

Si -0.81378000 2.23224200 -1.33913300

Si 0.48409000 -1.19888100 2.87130100

Si -0.99545700 -2.73982400 -0.51370300

Si 1.84083700 1.63280700 1.01929600

Si -3.32379000 -0.48933900 0.84688600

Si -2.36304100 3.39297400 -0.13927100

Si 0.08613800 1.23139000 2.55623300

Si -1.75920600 1.32500100 0.99684700

Anionic clusters

B3Si- Cluster

B 0.00000000 0.84570100 -0.64019500

B 0.00000000 -0.84570100 -0.64019500

B 0.00000000 0.00000000 -1.91218500

Si 0.00000000 0.00000000 1.14020600

B3Si2- Cluster

B 0.00000000 0.77300000 -1.17260700

B 0.00000000 0.00000000 0.33398300

B 0.00000000 -0.77300000 -1.17260700

Si -0.15184600 1.98535600 0.35914800

Si 0.15184600 -1.98535600 0.35914800

B3Si3- Cluster

B 0.00000000 0.78840800 0.00000000

B 1.57783800 0.39064100 0.00000000

B 0.48701300 -0.82797900 0.00000000

Si 2.48410200 -1.23616000 0.00000000

Si -1.47215400 -0.58179900 0.00000000

Si -1.74939400 1.69257700 0.00000000

B3Si4- Cluster

B -0.33062500 -1.57067700 0.77107900

B -0.33062500 -1.57067700 -0.77107900

B -0.88614300 -0.15268400 0.00000000

Si 1.37969400 -0.31220400 0.00000000

Si -0.33062500 -0.09110300 -2.01863000

Si -0.16580500 1.67085200 0.00000000

Si -0.33062500 -0.09110300 2.01863000

B3Si5- Cluster

B 0.93853600 -0.18037800 0.00000000

B 0.34008500 1.11312700 0.87598200

B 0.34008500 1.11312700 -0.87598200

Si 0.34008500 -0.57375500 -1.98138200

Si -1.33175900 -0.14457700 0.00000000

Si 0.54326800 -2.12016400 0.00000000

Si -0.46978800 2.68158100 0.00000000

Si 0.34008500 -0.57375500 1.98138200

B3Si6-Cluster

B -0.63769300 0.03182500 -0.83419700

B 0.18233900 -1.27003600 -0.09624300

B 0.92115200 0.23853700 -0.17449600

Si -0.20581700 1.94010600 -0.23946900

Si 2.20349100 -1.36033900 -0.07493000

Si -0.85622700 0.00648500 1.45864700

Si -1.73634900 -1.65867000 -0.36189600

Si -2.49376000 0.67271500 -0.32184500

Si 2.92230500 0.75672900 -0.06588700

B3Si7- Cluster

B 0.69029800 0.45397500 -0.37935100

B -0.57584800 0.00689200 0.72768900

B 0.27442600 -1.24914400 -0.07152500

Si 2.03117500 -1.13287800 -0.93870800

Si 2.58608000 1.08326600 -0.02127600

Si 1.56505700 -0.44164700 1.52482700

Si -1.70140600 -1.74967900 0.20178300

Si -2.50351300 0.52088100 0.81292100

Si -0.72778700 1.98134700 -0.19150900

Si -1.38849000 0.02023600 -1.48690000

B3Si8- Cluster

B -1.18827400 0.38372200 0.64035800

B -0.69426400 -1.30650200 -0.57774300

B 0.71666500 -1.29823900 0.31872100

Si 2.58136300 -0.81475200 0.20476500

Si -2.57110700 -0.80545900 -0.36078100

Si -0.54478000 2.29574300 0.46103900

Si -0.87243600 -1.44598100 1.61852500

Si 0.56796800 0.57017300 1.89621900

Si 1.35801800 1.17363900 -0.56228700

Si 0.90456600 -0.99725300 -1.81902000

Si -1.00720800 0.81711100 -1.57465100

B3Si9- Cluster

B 0.00000000 1.00943600 0.31978500

B 0.87419700 -0.50471800 0.31978500

B -0.87419700 -0.50471800 0.31978500

Si -1.46502100 -0.84583000 -1.73276200

Si 2.00941500 1.16013600 -0.39468700

Si 1.46502100 -0.84583000 -1.73276200

Si -1.32510200 0.76504800 2.01324000

Si 0.00000000 -1.53009600 2.01324000

Si 0.00000000 1.69166000 -1.73276200

Si -2.00941500 1.16013600 -0.39468700

Si 0.00000000 -2.32027300 -0.39468700

Si 1.32510200 0.76504800 2.01324000

B3Si10- Cluster

B -0.66672500 0.15759800 0.90218700

B 0.71567800 0.86694500 0.00000000

B -0.66672500 0.15759800 -0.90218700

Si 1.53871400 -0.67721300 1.29214100

Si -1.28001000 2.05449600 0.00000000

Si 0.43307300 1.59474500 -1.99121900

Si -2.07944200 -1.24234800 0.00000000

Si 1.00189400 2.99442300 0.00000000

Si 0.43307300 1.59474500 1.99121900

Si -0.66672500 -1.61750400 -2.03316800

Si -0.66672500 -1.61750400 2.03316800

Si 1.53871400 -0.67721300 -1.29214100

Si -0.03193400 -2.82881900 0.00000000

B3Si11- Cluster

B -0.05343500 -0.02940000 -1.45995400

B -0.28355700 0.82172500 0.07731500

B 1.14932800 0.98859500 -0.95599300

Si -0.23681300 -1.81617200 -0.22124800

Si -1.97748800 -0.07824300 1.31518300

Si 3.01588100 0.14238800 -0.15082100

Si 1.49224400 1.58315800 1.08929200

Si 1.66728100 -1.03291200 -1.83758700

Si 0.33796900 2.85509700 -0.60799100

Si 1.89604300 -1.98427300 0.77322300

Si 0.32164300 -0.32137500 1.89072200

Si -2.03889100 0.00852300 -1.34571900

Si -2.14329400 1.99580700 0.03763200

Si -2.62469500 -1.98803900 -0.10745900

B3Si12- Cluster

B -0.21985000 -0.20600800 0.87748900

B -0.21985000 -0.20600800 -0.87748900

B -0.00700300 1.25334500 0.00000000

Si 1.03777700 -3.15703200 0.00000000

Si 1.01254600 -1.48546300 -1.93431000

Si 1.31519700 0.89340100 -1.90169200

Si 1.68233100 2.47533600 0.00000000

Si 1.31519700 0.89340100 1.90169200

Si 1.01254600 -1.48546300 1.93431000

Si -1.51173800 -1.09607500 2.25070600

Si -1.07697800 1.35756900 2.00798100

Si -0.93723000 3.04069400 0.00000000

Si -1.07697800 1.35756900 -2.00798100

Si -1.51173800 -1.09607500 -2.25070600

Si -1.10139600 -1.99833600 0.00000000

B3Si13- Cluster

B -1.56028600 1.52904500 0.70130100

B -0.06553300 -0.85131300 -0.15974300

B 0.00794400 0.91662500 -0.09954900

Si 1.20718200 2.34258800 -1.37546500

Si -0.06951800 -1.16120200 2.02393600

Si 1.86812900 1.67280000 0.84675300

Si -1.46231900 -2.10619100 -1.35382800

Si -2.15188300 0.18617700 -1.24343500

Si -0.10011600 1.26861300 2.05171800

Si -1.26072200 2.41059900 -1.08965300

Si -2.04509300 -1.49433100 0.86954400

Si 1.74227100 -1.80631100 0.75324800

Si 1.76082500 -0.00413800 -1.27311400

Si 1.00789300 -2.30679900 -1.50398400

Si 3.46280100 -0.12331300 0.41629700

Si -3.38163800 0.55209400 0.72012200

B3Si14- Cluster

B -0.27789400 -0.39433100 0.87165400

B -1.07563800 0.92494100 0.00000000

B -0.27789400 -0.39433100 -0.87165400

Si 1.38108900 0.97629900 1.68304200

Si 1.33950100 -1.30531000 1.97243900

Si -0.86387400 1.88942200 1.95928400

Si -0.03459200 2.90128700 0.00000000

Si 1.38108900 0.97629900 -1.68304200

Si 2.08849300 -2.61041200 0.00000000

Si -0.36064600 -2.42146400 0.00000000

Si -1.11523400 -1.83224900 2.21231800

Si -2.48983900 0.13649900 1.38739300

Si -2.48983900 0.13649900 -1.38739300

Si -1.11523400 -1.83224900 -2.21231800

Si 2.38611000 2.35259700 0.00000000

Si -0.86387400 1.88942200 -1.95928400

Si 1.33950100 -1.30531000 -1.97243900

B3Si15- Cluster

B -0.35352400 0.90853600 -0.47490500

B 0.12374600 0.29337700 1.04643000

B 0.30548600 -0.84883300 -0.29717400

Si -3.16962000 -1.42124600 -0.07157400

Si 3.97837000 -0.53493800 -0.53791900

Si -1.77590100 2.58439300 0.26876600

Si -2.18286900 0.38465100 1.14089700

Si 0.27306000 -1.95541700 1.67891100

Si -1.05544000 -2.65370400 -0.12207400

Si -1.68568100 -0.49818200 -1.72271200

Si -1.34981500 1.87051500 -2.04331600

Si 0.68498400 2.47079900 0.54996100

Si -0.68754000 -0.12186200 2.93737500

Si 2.22829100 -0.81236500 0.92592400

Si 1.92320500 -0.38338700 -1.61697800

Si 1.49193300 1.05557300 2.42372600

Si 1.13375900 1.94315100 -1.77675300

Si 0.16622700 -2.05408100 -2.13221600

B3Si16- Cluster

B 0.00000000 1.33888400 -0.21946300

B 0.00000000 -1.33888400 -0.21946300

B 0.00000000 0.00000000 0.89665400

Si 1.15884800 -0.35436300 2.74444000

Si 3.43219900 0.59018300 -0.70121000

Si 1.30843300 -2.26666800 1.09682500

Si 0.85370200 3.24567600 0.56078100

Si -1.58254000 -2.02244500 -1.42821000

Si -0.30227800 1.17186400 -2.40295800

Si -1.87871600 -1.13396200 1.05475800

Si -1.15884800 0.35436300 2.74444000

Si 1.58254000 2.02244500 -1.42821000

Si 2.16444600 -1.49268900 -1.00616300

Si -2.16444600 1.49268900 -1.00616300

Si -0.85370200 -3.24567600 0.56078100

Si 0.30227800 -1.17186400 -2.40295800

Si -3.43219900 -0.59018300 -0.70121000

Si 1.87871600 1.13396200 1.05475800

Si -1.30843300 2.26666800 1.09682500

B3Si17- Cluster

B 0.45137400 0.78856900 -0.31604900

B 1.85678500 -0.14581300 -0.03371000

B -0.86234300 0.36796400 0.80069300

Si -1.41910900 -1.73208800 0.47429300

Si 1.67120600 1.67524000 1.17876900

Si -1.07184900 2.22252700 -0.77273000

Si 1.59015100 0.66819400 -2.10521500

Si -0.44086200 -2.69489900 -1.52512700

Si 1.79219300 -1.53134600 1.57873200

Si -2.96045000 0.22231600 -0.03985800

Si 1.73443800 -2.20943000 -0.59620300

Si -0.41249000 -1.20305500 2.59250400

Si -3.77771100 -1.91007100 0.46491600

Si 3.56754100 0.14338100 1.16248100

Si -2.17645100 2.02479900 1.33731400

Si -0.54578700 -0.39736800 -2.10457700

Si -2.47031500 1.01114800 -2.33706700

Si 3.49936400 -0.66337800 -1.27234600

Si -0.29582600 1.22822100 2.73280900

Si 1.19959400 2.78483900 -0.92974400

**Table S1** the local and total magnetic moments of per atom for the lowest energy structures of B3Sin (n=1-17) clusters.

**B3Si**

| Atom | *μ*s | Atom | *μ*s | Σ*μ*s |
| --- | --- | --- | --- | --- |
| B | -0.35 | Si | -0.13 | -1.00 |
| B | -0.26 |  |  |  |
| B | -0.26 |  |  |  |

**B3Si2**

| Atom | *μ*s | Atom | *μ*s | Σ*μ*s |
| --- | --- | --- | --- | --- |
| B | -0.29 | Si | -0.09 | -1.00 |
| B | -0.27 | Si | -0.09 |  |
| B | -0.27 |  |  |  |

**B3Si3**

| Atom | *μ*s | Atom | *μ*s | Σ*μ*s |
| --- | --- | --- | --- | --- |
| B | -0.01 | Si | -0.20 | -1.00 |
| B | -0.02 | Si | -0.35 |  |
| B | -0.22 | Si | -0.21 |  |

**B3Si4**

| Atom | *μ*s | Atom | *μ*s | Σ*μ*s |
| --- | --- | --- | --- | --- |
| B | -0.23 | Si | -0.43 | -1.00 |
| B | -0.23 | Si | 0.01 |  |
| B | -0.02 | Si | -0.13 |  |
|  |  | Si | 0.01 |  |

**B3Si5**

| Atom | *μ*s | Atom | *μ*s | Σ*μ*s |
| --- | --- | --- | --- | --- |
| B | 0.02 | Si | -0.04 | -1.00 |
| B | -0.30 | Si | -0.09 |  |
| B | 0.02 | Si | -0.04 |  |
|  |  | Si | -0.50 |  |
|  | Si | -0.09 |  |

**B3Si6**

| Atom | *μ*s | Atom | *μ*s | Σ*μ*s |
| --- | --- | --- | --- | --- |
| B | -0.04 | Si | -0.12 | -1.00 |
| B | 0.02 | Si | 0.01 |  |
| B | -0.01 | Si | -0.10 |  |
|  |  | Si | -0.30 |  |
|  | Si | -0.01 |  |
|  | Si | -0.45 |  |

**B3Si7**

| Atom | *μ*s | Atom | *μ*s | Σ*μ*s |
| --- | --- | --- | --- | --- |
| B | 0.00 | Si | -0.14 | -1.00 |
| B | 0.02 | Si | -0.38 |  |
| B | -0.01 | Si | -0.17 |  |
|  |  | Si | -0.23 |  |
|  |  | Si | -0.09 |  |
|  | Si | -0.01 |  |
|  | Si | 0.00 |  |

**B3Si8**

| Atom | *μ*s | Atom | *μ*s | Σ*μ*s |
| --- | --- | --- | --- | --- |
| B | 0.02 | Si | -0.41 | -1.00 |
| B | -0.05 | Si | -0.18 |  |
| B | -0.03 | Si | -0.12 |  |
|  |  | Si | -0.01 |  |
|  |  | Si | -0.07 |  |
|  | Si | -0.11 |  |
|  | Si | -0.01 |  |
|  | Si | -0.04 |  |

**B3Si9**

| Atom | *μ*s | Atom | *μ*s | Σ*μ*s |
| --- | --- | --- | --- | --- |
| B | -0.03 | Si | -0.24 | -1.00 |
| B | -0.03 | Si | -0.24 |  |
| B | -0.03 | Si | -0.24 |  |
|  |  | Si | -0.08 |  |
|  |  | Si | -0.08 |  |
|  | Si | -0.08 |  |
|  | Si | 0.01 |  |
|  | Si | 0.01 |  |
|  | Si | 0.01 |  |

**B3Si10**

| Atom | *μ*s | Atom | *μ*s | Σ*μ*s |
| --- | --- | --- | --- | --- |
| B | -0.04 | Si | 0.00 | -1.00 |
| B | -0.05 | Si | -0.21 |  |
| B | -0.04 | Si | -0.03 |  |
|  |  | Si | -0.11 |  |
|  |  | Si | -0.07 |  |
|  | Si | 0.00 |  |
|  | Si | -0.42 |  |
|  | Si | 0.01 |  |
|  | Si | -0.04 |  |
|  | Si | -0.02 |  |

**B3Si11**

| Atom | *μ*s | Atom | *μ*s | Σ*μ*s |
| --- | --- | --- | --- | --- |
| B | -0.04 | Si | -0.03 | -1.00 |
| B | 0.01 | Si | -0.05 |  |
| B | 0.01 | Si | -0.06 |  |
|  |  | Si | -0.29 |  |
|  |  | Si | -0.06 |  |
|  | Si | -0.07 |  |
|  | Si | -0.03 |  |
|  | Si | -0.05 |  |
|  | Si | -0.05 |  |
|  | Si | -0.29 |  |
|  | Si | 0.00 |  |

**B3Si12**

| Atom | *μ*s | Atom | *μ*s | Σ*μ*s |
| --- | --- | --- | --- | --- |
| B | 0.00 | Si | -0.01 | -1.00 |
| B | 0.00 | Si | -0.06 |  |
| B | 0.00 | Si | -0.05 |  |
|  |  | Si | -0.06 |  |
|  |  | Si | -0.01 |  |
|  | Si | -0.02 |  |
|  | Si | -0.07 |  |
|  | Si | -0.02 |  |
|  | Si | 0.00 |  |
|  | Si | -0.02 |  |
|  | Si | -0.07 |  |
|  | Si | -0.62 |  |

**B3Si13**

| Atom | *μ*s | Atom | *μ*s | Σ*μ*s |
| --- | --- | --- | --- | --- |
| B | -0.02 | Si | -0.01 | -1.00 |
| B | 0.00 | Si | -0.02 |  |
| B | 0.01 | Si | -0.08 |  |
|  |  | Si | -0.06 |  |
|  |  | Si | 0.01 |  |
|  | Si | -0.07 |  |
|  | Si | -0.02 |  |
|  | Si | -0.01 |  |
|  | Si | -0.06 |  |
|  | Si | 0.00 |  |
|  | Si | -0.03 |  |
|  | Si | -0.01 |  |
|  | Si | -0.63 |  |

**B3Si14**

| Atom | *μ*s | Atom | *μ*s | Σ*μ*s |
| --- | --- | --- | --- | --- |
| B | 0.02 | Si | 0.00 | -1.00 |
| B | -0.05 | Si | -0.07 |  |
| B | 0.02 | Si | -0.07 |  |
|  |  | Si | -0.06 |  |
|  |  | Si | -0.05 |  |
|  | Si | -0.05 |  |
|  | Si | -0.02 |  |
|  | Si | -0.05 |  |
|  | Si | -0.19 |  |
|  | Si | -0.07 |  |
|  | Si | -0.06 |  |
|  | Si | -0.10 |  |
|  | Si | -0.19 |  |
|  | Si | -0.02 |  |

**B3Si15**

| Atom | *μ*s | Atom | *μ*s | Σ*μ*s |
| --- | --- | --- | --- | --- |
| B | -0.01 | Si | -0.02 | -1.00 |
| B | -0.01 | Si | -0.04 |  |
| B | 0.02 | Si | -0.05 |  |
|  |  | Si | -0.07 |  |
|  |  | Si | -0.04 |  |
|  | Si | -0.02 |  |
|  | Si | -0.08 |  |
|  | Si | -0.12 |  |
|  | Si | -0.02 |  |
|  | Si | -0.04 |  |
|  | Si | -0.20 |  |
|  | Si | -0.08 |  |
|  | Si | -0.17 |  |
|  | Si | -0.01 |  |
|  | Si | -0.05 |  |

**B3Si16**

| Atom | *μ*s | Atom | *μ*s | Σ*μ*s |
| --- | --- | --- | --- | --- |
| B | -0.09 | Si | 0.00 | -1.00 |
| B | -0.06 | Si | 0.00 |  |
| B | -0.07 | Si | -0.03 |  |
|  |  | Si | -0.01 |  |
|  |  | Si | -0.02 |  |
|  | Si | -0.06 |  |
|  | Si | -0.05 |  |
|  | Si | -0.03 |  |
|  | Si | -0.01 |  |
|  | Si | -0.20 |  |
|  | Si | -0.03 |  |
|  | Si | -0.02 |  |
|  | Si | -0.23 |  |
|  | Si | -0.04 |  |
|  | Si | 0.00 |  |
|  | Si | -0.05 |  |

**B3Si17**

| Atom | *μ*s | Atom | *μ*s | Σ*μ*s |
| --- | --- | --- | --- | --- |
| B | 0.00 | Si | -0.03 | -1.00 |
| B | -0.01 | Si | -0.01 |  |
| B | 0.00 | Si | -0.06 |  |
|  |  | Si | 0.00 |  |
|  |  | Si | -0.02 |  |
|  | Si | -0.03 |  |
|  | Si | -0.03 |  |
|  | Si | 0.00 |  |
|  | Si | -0.02 |  |
|  | Si | 0.00 |  |
|  | Si | -0.02 |  |
|  | Si | -0.01 |  |
|  | Si | 0.00 |  |
|  | Si | -0.02 |  |
|  | Si | -0.68 |  |
|  | Si | -0.02 |  |
|  | Si | -0.02 |  |

1. * Correspondence to:Yan-Fei Hu, School of Physics and Electronic Engineering, Sichuan University of Science ＆ Engineering, Zigong 643000, China. E-mail address: [yanfei_­­hu1982@suse.edu.cn](mailto:huyanfei1982@126.com) [↑](#footnote-ref-2)
